# Supplementary material for: A novel reflectance-based aptasensor using gold nanoparticles for the detection of oxytetracycline
Source: Royal Society of Chemistry journal article supplement (doi:10.1039/c5an00726g), 2015-01-01
Supplement: c5an00726g1.pdf [file c5an00726g1.pdf]

## Supplementary Information

### **A Novel Reflectance-based Aptasensor Using Gold Nanoparticles for the Detection of Oxytetracycline**

Ho Bin Seo<sup>a</sup>, Young Seop Kwon<sup>a</sup>, Ji-eun Lee<sup>a</sup>, David Cullen<sup>b</sup>, Hongseok (Moses) Noh<sup>c\*\*</sup> and Man  
Bock Gu<sup>a\*</sup>

<sup>a</sup>College of Life Sciences and Biotechnology, Korea University, Anam-dong, Seonbuk-gu, Seoul,  
136-713, Rep. Korea

<sup>b</sup>Cranfield Biotechnology Centre, Institute of BioScience and Technology, Cranfield University at  
Silsoe, Silsoe, Bedfordshire, U.K.

<sup>c</sup>Department of Mechanical Engineering and Mechanics, Drexel University, 3141 Chestnut St.,  
Philadelphia, PA, 19104, USA

\*\*CO- CORRESPONDING AUTHOR FOOTNOTE

\*CORRESPONDING AUTHOR FOOTNOTE

Phone: +82-2-3290-3417

Fax: +82-2-928-3555

E-mail: [mbgu@korea.ac.kr](mailto:mbgu@korea.ac.kr)

## Supplementary data

### S1. Absorbance spectrums and reflectance intensities for the AuNP solutions

We compared the absorbance signal with the reflectance signal (**Fig. S1**). In case of absorbance, the peak at 520 nm wavelength was unstable at 8 nM and 10 nM AuNPs concentrations (**Fig. S1 (a)**). However, in case of the reflectance, the peak (blue line, 520 nm wavelength) remained stable at 2, 4, 6, 8 and 10 nM AuNPs concentrations. The peak shifting from 520 to 650 nm after the aggregation of AuNPs was also observed at all samples (red line) (**Fig. S1 (b)–(f)**).

(a)

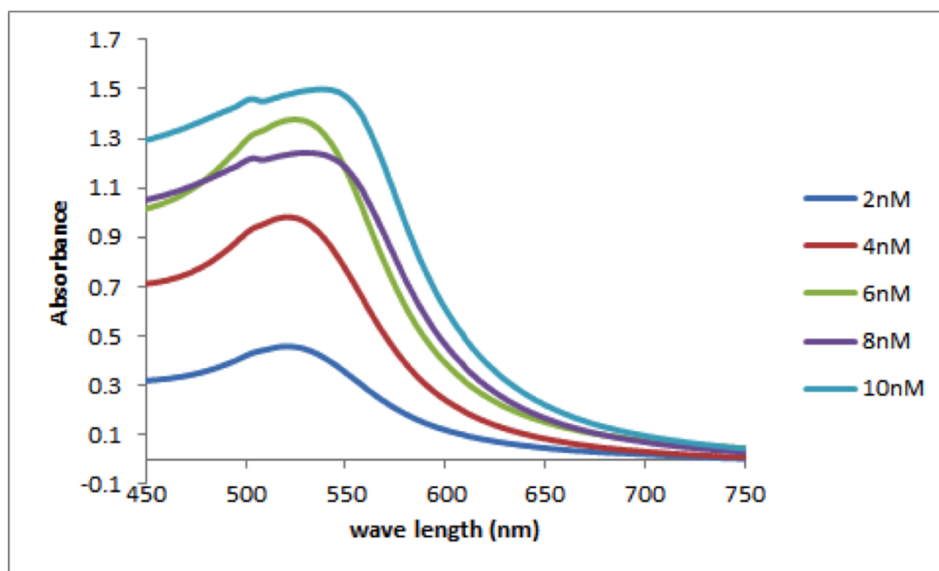

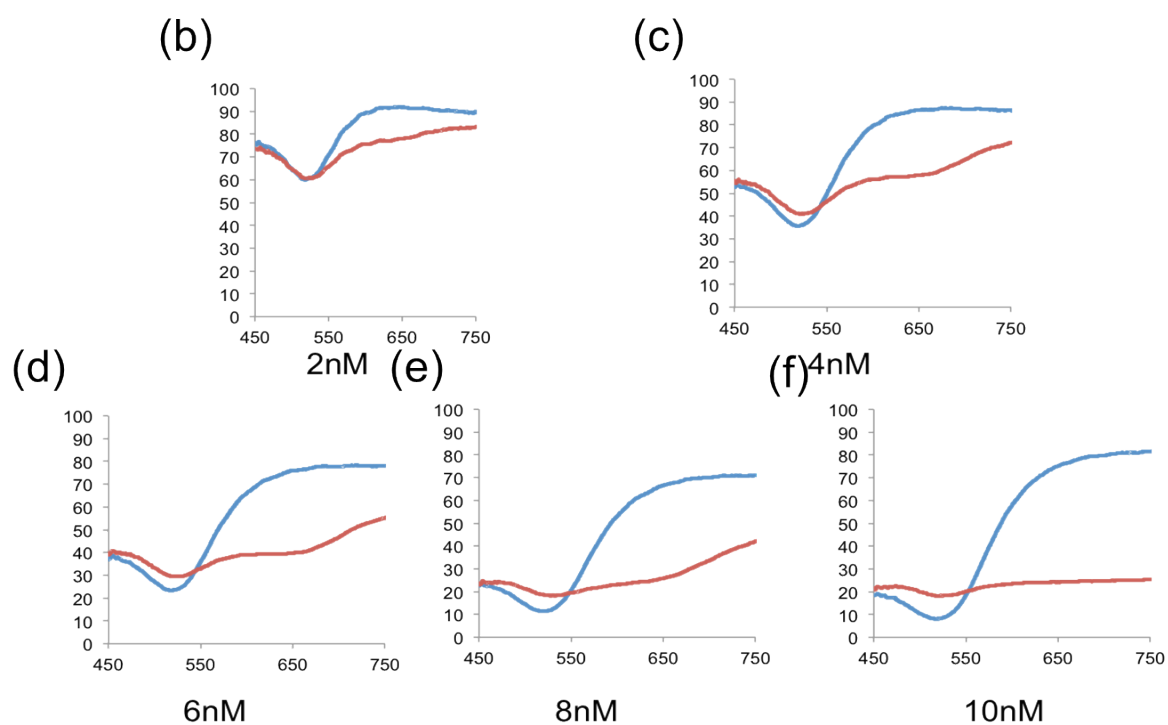

**Figure S1.** The comparison of absorbance and reflectance systems: (a) the absorbance spectrum at different AuNP concentrations (2~10 nM) and (b-f) the relative reflectance intensity of AuNPs only (blue line) and AuNPs+salt (red line) at different AuNP concentrations of 2 nM, 4 nM, 6 nM, 8 nM, and 10 nM, respectively.

## S2. TEM images for AuNPs

AuNP conditions in binding assay were analyzed by TEM Characterization (**Fig. S2**). The AuNP concentration was 2nM and oxtetracycline concentrations are different from 0 to 25 $\mu$ M. The aggregation of AuNP increased as high target concentrations.

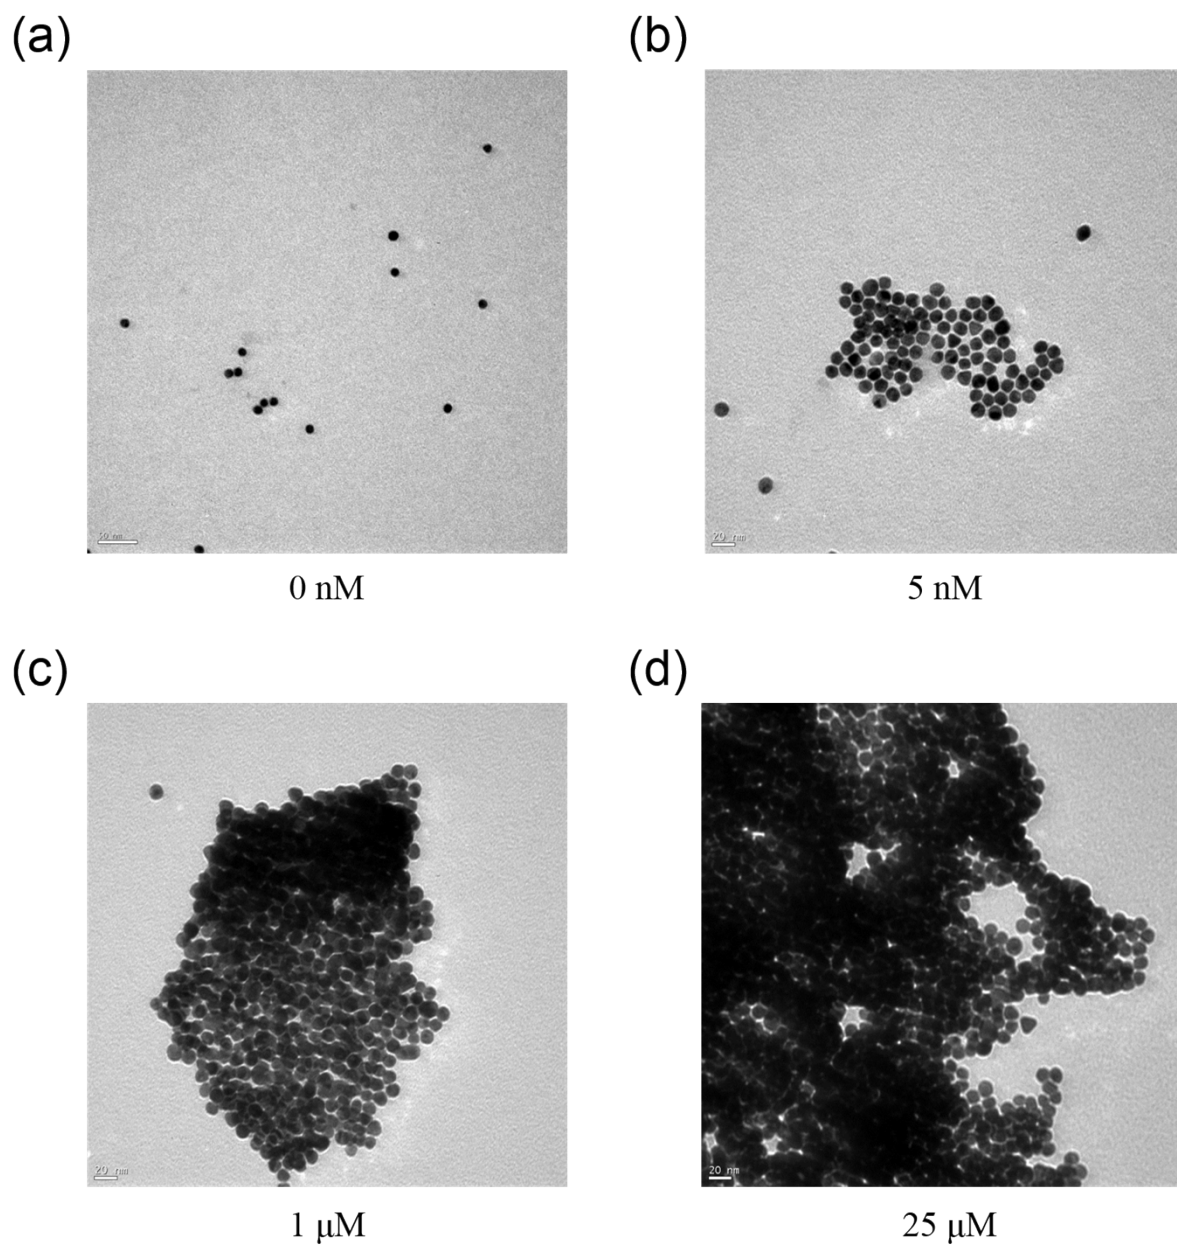

**Figure S2.** TEM characterization of AuNPs in different states (a) OTC 0 nM, scale bar 50 nm, (b) OTC 5 nM, scale bar 20 nm (c) OTC 1  $\mu$ M, scale bar 20 nm (d) OTC 25  $\mu$ M, scale bar 20 nm.
